# Supplementary material for: Ferritin Heavy Chain Binds Peroxiredoxin 6 and Inhibits Cell Proliferation and Migration
Source: MDPI journal article supplement (doi:10.3390/ijms232112987), 2022-10-26
Supplement: s1 [file s1]

## Supplementary Materials

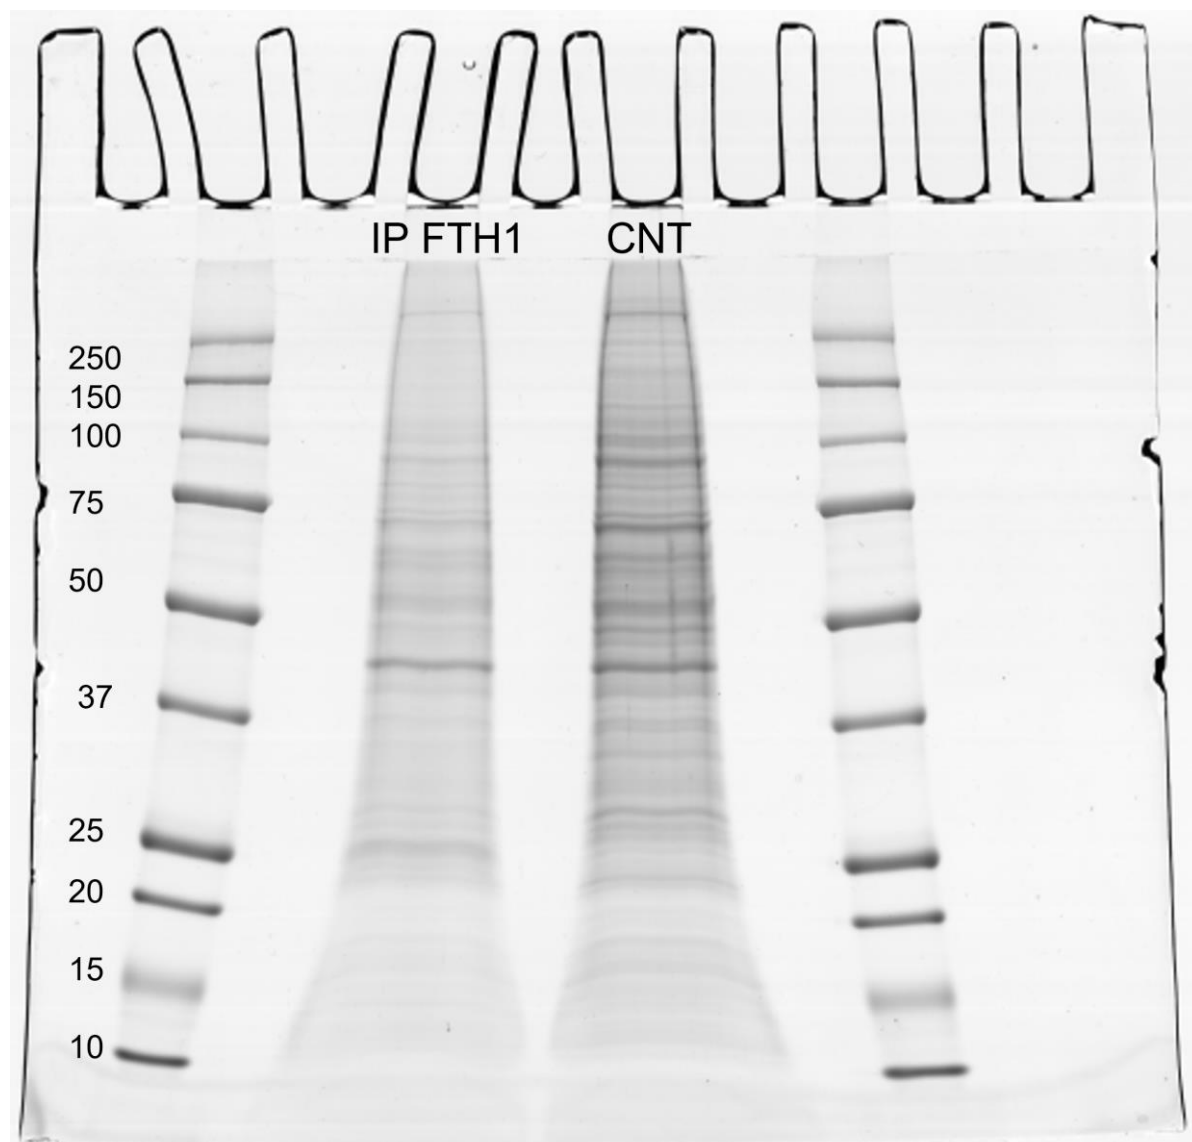

**Figure S1** SDS-PAGE of the eluted proteins from the immunoprecipitation experiment (IP FTH1) and control (CNT).

**Table S1.** List of FTH1 interactors identified in the functional proteomics experiment. Experimental electrophoretic mobility (mass range), protein and gene names, UniProt entry codes and the number of identified peptides (in the bracket those overcoming Mascot threshold) are reported.

| Mass Ranges (KDa) | Protein Name                                                 | Gene    | UniProt Code | Peptides |
|-------------------|--------------------------------------------------------------|---------|--------------|----------|
| 250-150           | Pericentriolar material 1 protein                            | PCM1    | Q15154       | 7(3)     |
| 150-100           | Structural maintenance of chromosomes protein 3              | SMC3    | Q9UQE7       | 13(8)    |
|                   | Cytospin-A                                                   | SPECC1L | Q69YQ0       | 7(3)     |
|                   | Myosin phosphatase Rho-interacting protein                   | MPRIIP  | Q6WCQ1       | 13(6)    |
|                   | Unconventional myosin-Id                                     | MYO1D   | O94832       | 17(9)    |
|                   | HAUS augmin-like complex subunit 6                           | HAUS6   | Q7Z4H7       | 4(3)     |
| 100-75            | Neurabin-2                                                   | PPP1R9B | Q96SB3       | 10 (6)   |
|                   | Bromodomain-containing protein 2                             | BRD2    | P25440       | 3(2)     |
|                   | Hepatocyte growth factor-regulated tyrosine kinase substrate | HGS     | O14964       | 4(5)     |
|                   | Nuclear autoantigenic sperm protein                          | NASP    | P49321       | 5(5)     |
|                   | Plakophilin-1                                                | PKP1    | Q13835       | 6(4)     |
|                   | DNA replication licensing factor MCM5                        | MCM5    | P33992       | 6(3)     |
|                   | Junction plakoglobin                                         | JUP     | P14923       | 21(12)   |
|                   | SUN domain-containing protein 2                              | SUN2    | Q9UH99       | 4(2)     |
|                   | Protein-glutamine gamma-glutamyltransferase E                | TGM3    | Q08188       | 4(4)     |
| 75-50             | Sec1 family domain-containing protein 1                      | SCFD1   | Q8WVM8       | 9(8)     |
|                   | Phosphoenolpyruvate carboxykinase [GTP], mitochondrial       | PCK2    | Q16822       | 6(4)     |
|                   | Nuclear receptor coactivator 4                               | NCOA4   | Q13772       | 5(2)     |
|                   | Leukotriene A-4 hydrolase                                    | LTA4H   | P09960       | 4(3)     |
|                   | Tyrosine-protein phosphatase non-receptor type 11            | PTPN11  | Q06124       | 14(7)    |
|                   | Threonylcarbamoyladenosine tRNA methyltransferase            | CDKAL1  | Q5VV42       | 3(2)     |
|                   | Keratinocyte proline-rich protein                            | KPRP    | Q5T749       | 5(4)     |
|                   | SNW domain-containing protein 1                              | SNW1    | Q13573       | 5(4)     |
|                   | Tyrosine-protein kinase Yes                                  | YES1    | P07947       | 9(5)     |
|                   | Suprabasin                                                   | SBSN    | Q6UWP8       | 4(4)     |
|                   | Regulator of nonsense transcripts 3B                         | UPF3B   | Q9BZI7       | 5(3)     |
|                   | Centrosomal protein of 55 kDa                                | CEP55   | Q53EZ4       | 10(4)    |
|                   | Vimentin                                                     | VIM     | P08670       | 30(22)   |
|                   | Peptidyl-prolyl cis-trans isomerase FKBP5                    | FKBP5   | Q13451       | 7(5)     |
|                   | WAS protein family homolog 2                                 | WASH2P  | Q6VEQ5       | 2(2)     |

|       |                                                                |        |        |        |
|-------|----------------------------------------------------------------|--------|--------|--------|
| 50-37 | Flotillin-1                                                    | FLOT1  | O75955 | 2(2)   |
|       | Guanine nucleotide-binding protein subunit alpha-13            | GNA13  | Q14344 | 2(2)   |
|       | Endoplasmic reticulum-Golgi intermediate compartment protein 2 | ERGIC2 | Q96RQ1 | 2(2)   |
|       | NIF3-like protein 1                                            | NIF3L1 | Q9GZT8 | 2(2)   |
|       | cAMP-dependent protein kinase catalytic subunit alpha          | PRKACA | P17612 | 4(2)   |
|       | Guanine nucleotide-binding protein G(i) subunit alpha-1        | GNAI1  | P63096 | 3(2)   |
|       | IST1 homolog                                                   | IST1   | P53990 | 3(3)   |
|       | Inhibitor of nuclear factor kappa-B kinase-interacting protein | IKBIP  | Q70UQ0 | 5(3)   |
| 37-25 | Reticulocalbin-2                                               | RCN2   | Q14257 | 8(7)   |
|       | Four and a half LIM domains protein 1                          | FHL1   | Q13642 | 2(2)   |
|       | EF-hand domain-containing protein D1                           | EFHD1  | Q9BUP0 | 6(5)   |
|       | Ribosomal RNA small subunit methyltransferase NEP1             | EMG1   | Q92979 | 2(2)   |
|       | 40S ribosomal protein S3                                       | RPS3   | P23396 | 7(3)   |
|       | Peroxiredoxin-6                                                | PRDX6  | P30041 | 13(11) |
| 25-20 | Heat shock protein beta-1                                      | HSPB1  | P04792 | 8(5)   |
|       | Ras-related C3 botulinum toxin substrate 1                     | RAC1   | P63000 | 5(4)   |
|       | Ferritin heavy chain                                           | FTH1   | P02794 | 18(13) |
| 20-10 | Ezrin                                                          | N/A    | Q9UK20 | 2(2)   |
|       | 40S ribosomal protein S10                                      | RPS10  | P46783 | 5(3)   |
|       | Galectin-7                                                     | LGALS7 | P47929 | 6(3)   |
|       | Replication protein A 14 kDa subunit                           | RPA3   | P35244 | 4(2)   |

**Table S2:** Co-expression of FTH1 and PRDX6 in different tissue

| tissue      | description            | strength | FDR     |
|-------------|------------------------|----------|---------|
|             | Hematopoietic          |          |         |
| BTO:0000570 | system                 | 0,67     | 0,0017  |
| BTO:0000089 | Blood                  | 0,81     | 0,00084 |
| BTO:0000345 | Digestive gland        | 0,61     | 0,0135  |
| BTO:0000511 | Gastrointestinal tract | 0,71     | 0,0221  |
| BTO:0000759 | Liver                  | 0,66     | 0,0414  |

**Table S3:** FTH1 and PRDX6 partner in several biological processes

See excel file Table S3
